# Supplementary material for: Dual roles of the sterol recognition region in Hedgehog protein modification
Source: PubMed Central journal article supplement (PMC7242414; doi:10.1038/s42003-020-0977-2), 2020-05-21
Supplement: 42003_2020_977_MOESM1_ESM.pdf [file 42003_2020_977_MOESM1_ESM.pdf]

## Supplementary Figures

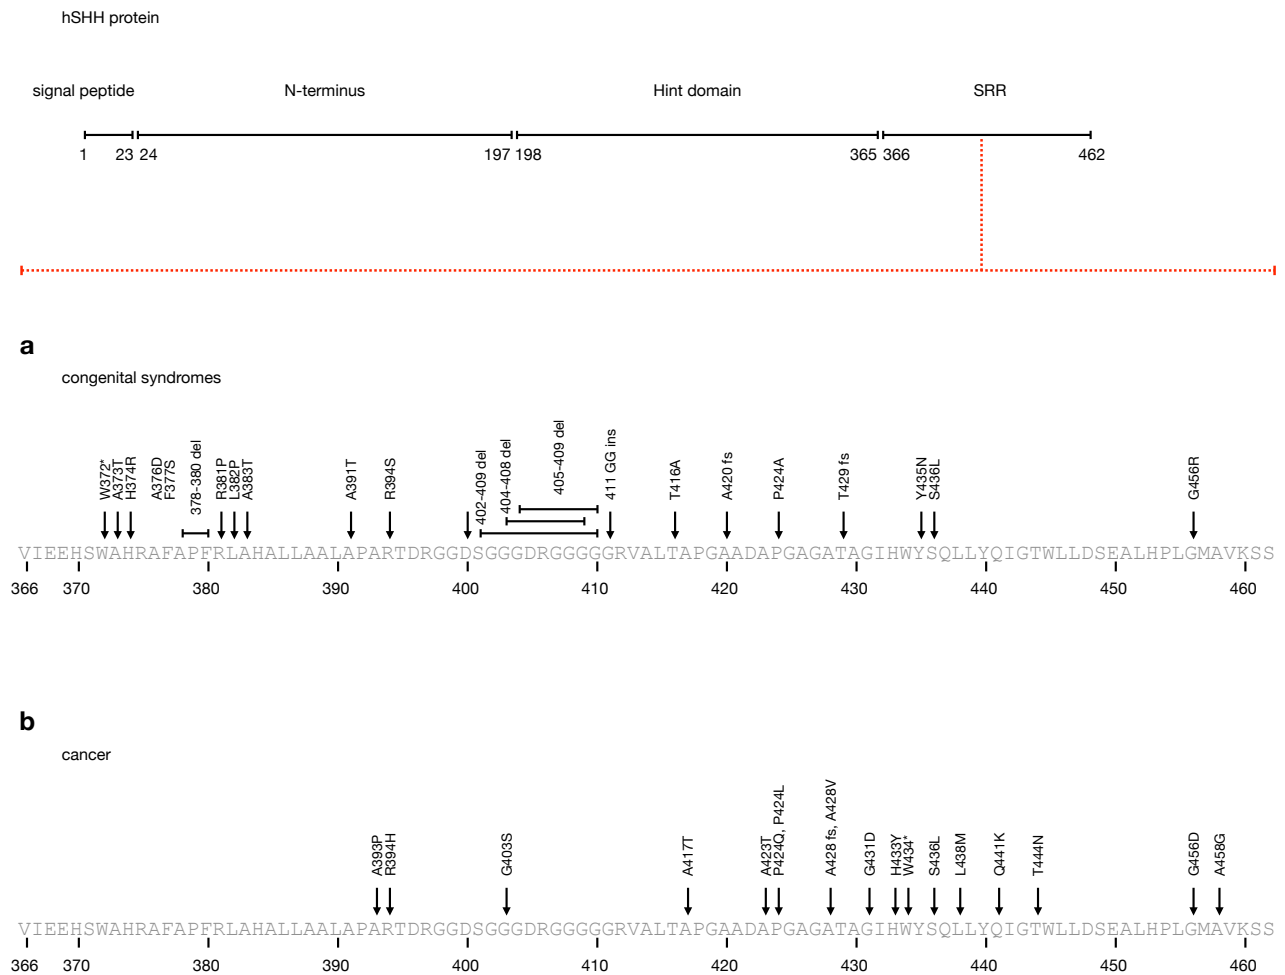

**Supplementary Fig. 1 Disease-associated mutations in the hSHH SRR.** **a** Mutations within the hSHH SRR associated with holoprosencephaly (Supplementary Refs. 1, 2, 3, 4, and 5) and dbSNP.<sup>6</sup> **b** Mutations within the hSHH SRR discovered in human cancer tissues. Data from COSMIC,<sup>7</sup> ClinVar<sup>8</sup>, cBioPortal,<sup>9</sup> and dbSNP.<sup>6</sup>

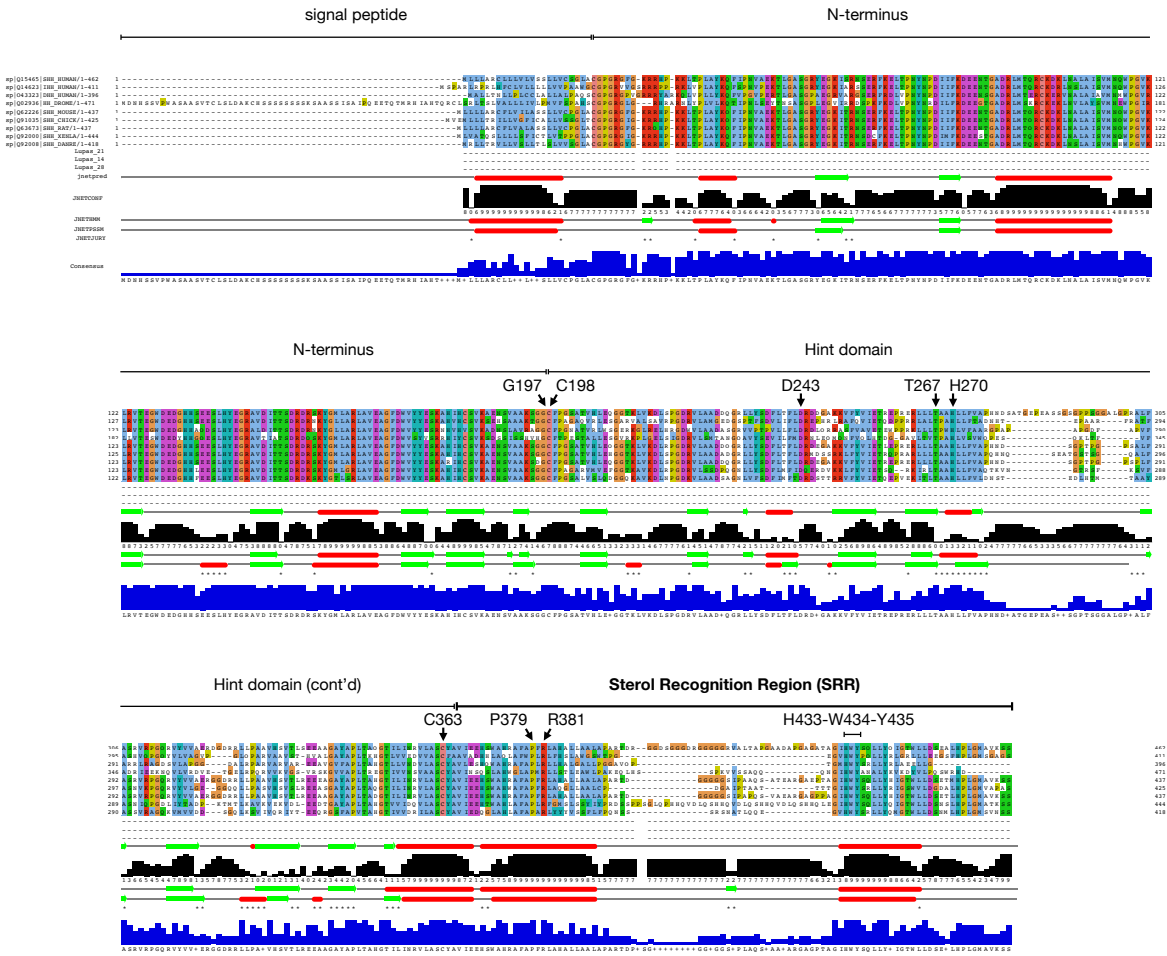

**Supplementary Fig. 2 Alignment of selected Hh proteins.** Clustal alignment showing conserved signal peptide, N-terminal domain, Hint domain, and SRR; Hint domain catalytic residues are indicated (hSHH numbering). Plot below shows Jpred4 secondary structure prediction for the consensus sequence.<sup>10,11</sup> Red cylinders indicate  $\alpha$ -helices; green arrows indicate  $\beta$ -sheets; JNETCONF indicates confidence in secondary structure prediction at each residue.



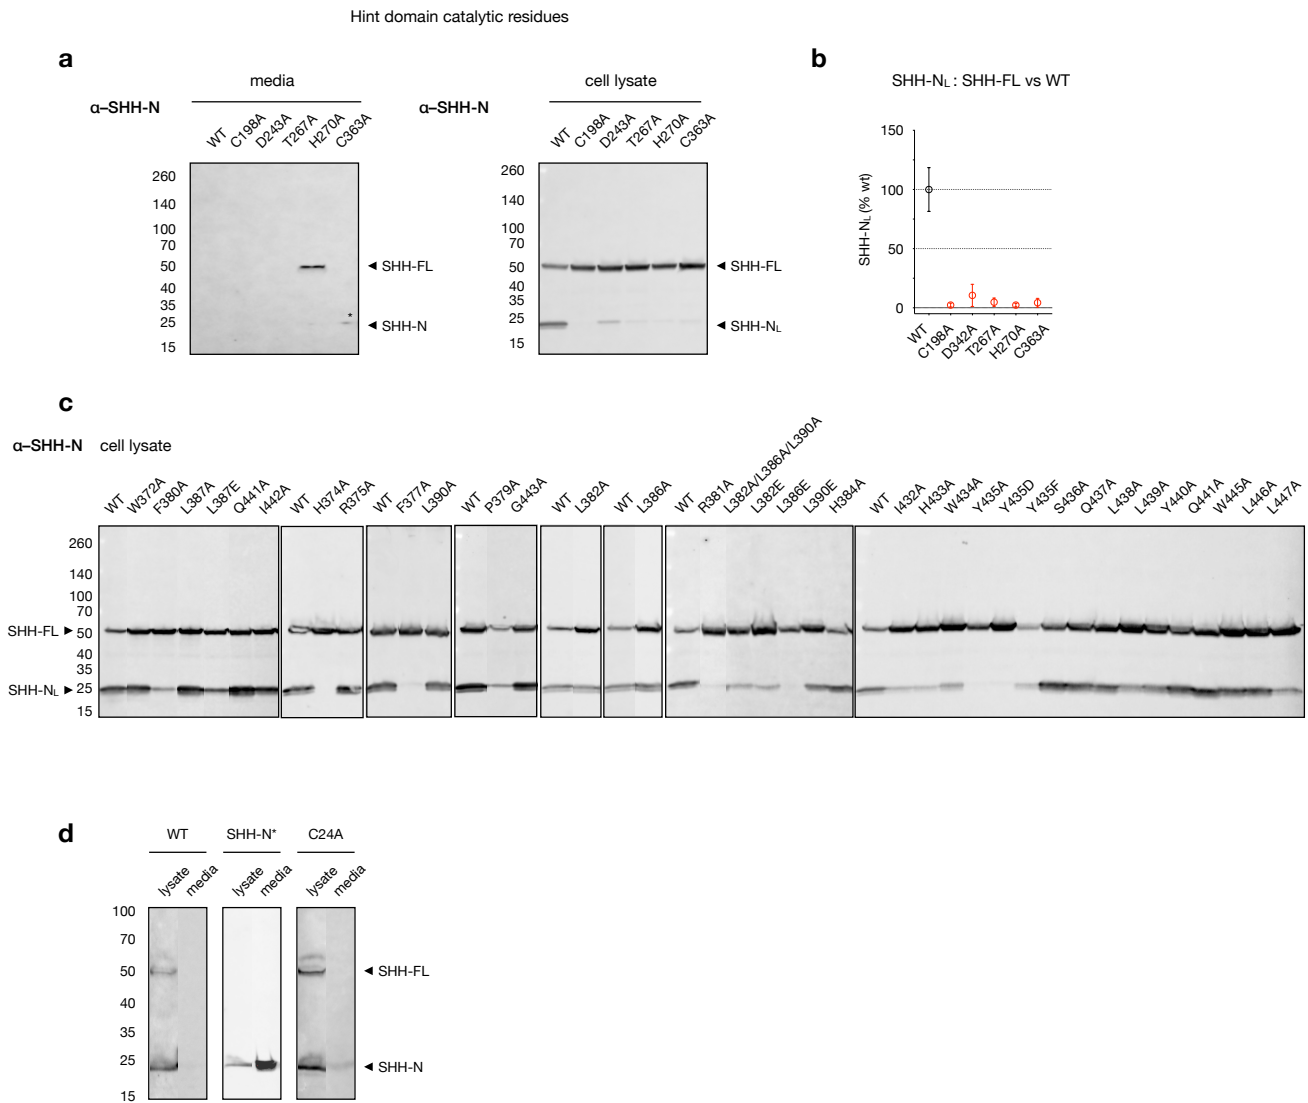

**Supplementary Fig. 3 Western blot analysis of secreted and cell-associated protein from hSHH-overexpressing cells.** **a** Western blot analysis of wild-type hSHH protein and Hint domain mutants expressed in HEK293T cells. Left: Analysis of hSHH-N produced by each mutant and precipitated from cell media. Right: Western blot of hSHH-N present in the corresponding lysates (hSHH-N<sub>L</sub>) of each mutant. **b** Plot of relative hSHH-N<sub>L</sub> production versus wild-type protein by each mutant for  $n = 3-10$  biological replicates. A biological replicate for wild-type protein was analyzed in each blot. Symbols represent the mean production of hSHH-N<sub>L</sub> versus wild-type protein for each mutant  $\pm$  s.d. Mutants that produced  $\leq 50\%$  hSHH-N<sub>L</sub> protein relative to wild-type protein are indicated in red. **c** Western Blot image for each mutant in Fig. 2b, 2c, 2e, and 2f. Relative hSHH-N<sub>L</sub> production for each mutant was calculated from  $n = 3-10$  biological replicates and plotted in Fig. 2. **d** Comparison of protein retained in lysates or secreted into cell media for wild-type protein, cholesterolylation-deficient hSHH-N (residues 1-197 of hSHHN, hSHH-N\*), and a palmitoylation-deficient hSHH mutant (C24A).

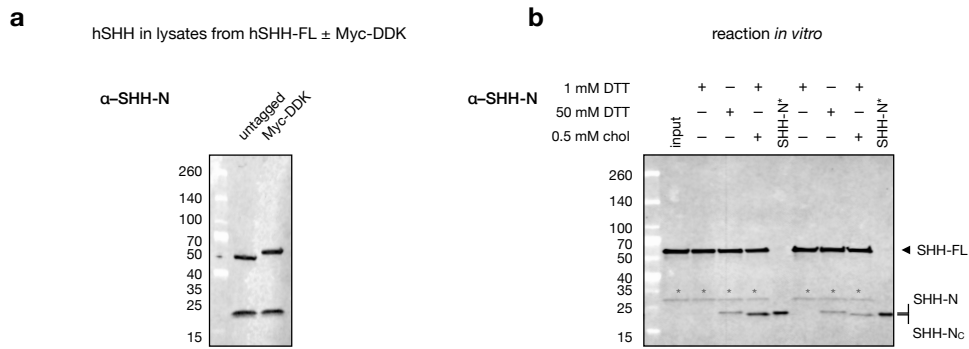

**Supplementary Fig. 4 A C-terminal Myc-DDK tag enables isolation of hSHH-FL from overexpressing HEK293T cells and cholesterololysis *in vitro*.** **a** Western blot of HEK293T cells transfected with untagged and C-terminal Myc-DDK tagged hSHH-FL shows equivalent production of cell-associated hSHH-N (hSHH-N<sub>L</sub>). **b** Full blot showing *in vitro* cholesterololysis of wild-type hSHH protein. Stars (\*) indicate residual mouse IgG from the agarose-conjugated anti-FLAG antibody.

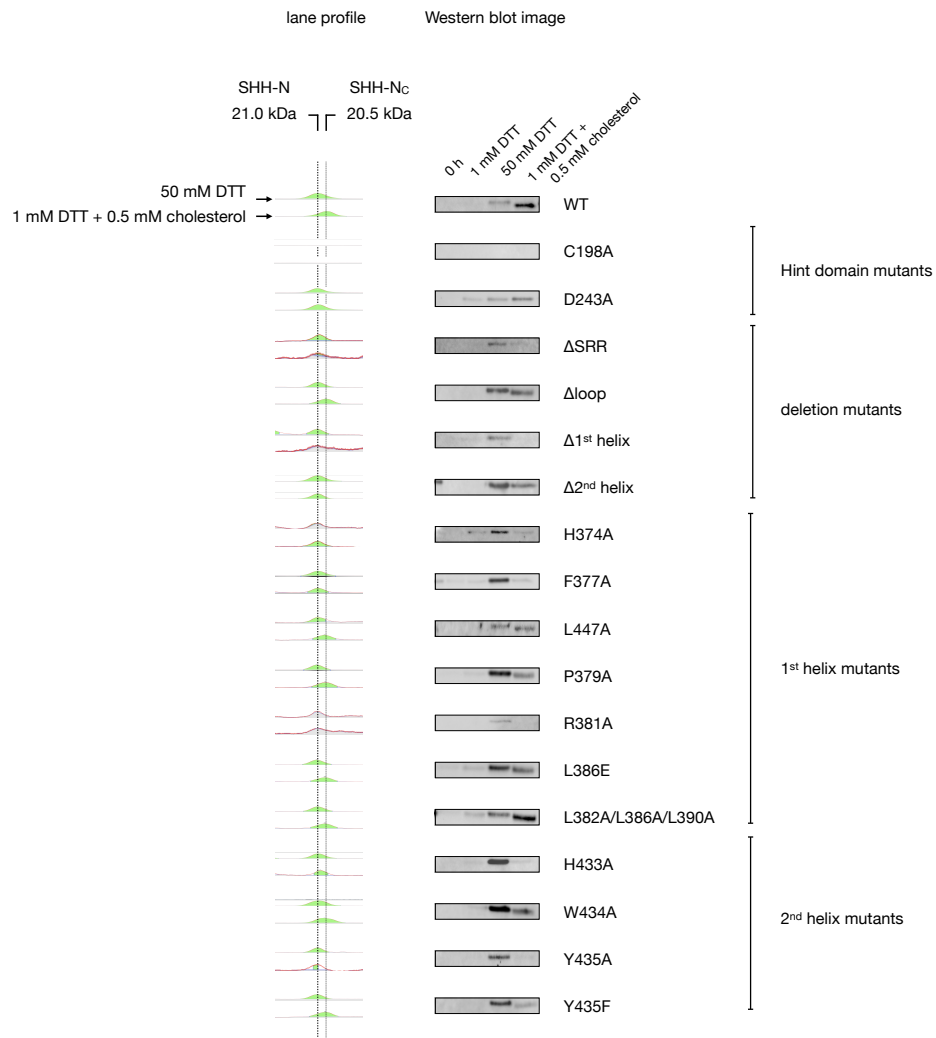

**Supplementary Fig. 5 Determination of cholesterololysis *in vitro* by electrophoretic mobility shift of hSHH-Nc.** Traces to the left show lane profiles with electrophoretic mobilities standardized to calibrated protein markers using Image Lab software. Panels to the right show corresponding Western blot images.

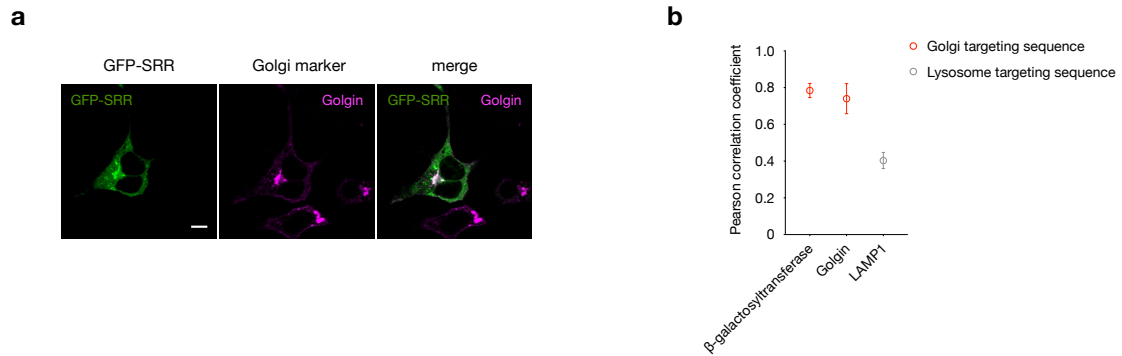

**Supplementary Fig. 6 Subcellular colocalization studies with EGFP-hSHH(SRR).** **a** Confocal microscopy image of HEK293T cells co-transfected with EGFP-SRR (EGFP-hSHH(365-462)) and mCherry fused to the Golgi-targeting sequence of Golgin. **b** Plot of Pearson correlation analysis of overlap between mCherry markers fused to Golgi-targeting sequences from  $\beta$ 4-galactosyltransferase-1 ( $\beta$ 4Gal-T1) and Golgin, and lysosome-targeting sequence from LAMP1. Symbols represent the mean value of Pearson correlation coefficient  $\pm$  s.d. from  $n = 3$ –10 cells in three separate experiments, calculated using the Coloc 2 plugin in ImageJ. Scale bar = 10  $\mu$ m.

## Supplementary References

---

- <sup>1</sup> Roessler, E. et al. The mutational spectrum of holoprosencephaly-associated changes within the SHH gene in humans predicts loss-of-function through either key structural alterations of the ligand or its altered synthesis. *Hum. Mutat.* **30**, E921-35 (2009).
- <sup>2</sup> Hehr, U. et al. Wide phenotypic variability in families with holoprosencephaly and a sonic hedgehog mutation. *Eur. J. Pediatr.* **163**, 347–352 (2004).
- <sup>3</sup> Dubourg, C. et al. Molecular screening of SHH, ZIC2, SIX3, and TGIF genes in patients with features of holoprosencephaly spectrum: Mutation review and genotype–phenotype correlations. *Hum. Mut.* **24**, 43–51 (2004).
- <sup>4</sup> Roessler, E. et al. Mutations in the C-terminal domain of Sonic Hedgehog cause holoprosencephaly. *Hum. Mol. Genet.* **6**, 1847–1853 (1997).
- <sup>5</sup> Nanni, L. et al. The mutational spectrum of the Sonic Hedgehog gene in holoprosencephaly: SHH mutations cause a significant proportion of autosomal dominant holoprosencephaly. *Hum. Mol. Genet.* **8**, 2479–2488 (1999).
- <sup>6</sup> Sherry, S. et al. dbSNP: the NCBI database of genetic variation. *Nucleic Acids Res.* **29**, 308–311 (2001).
- <sup>7</sup> Sondka, Z. et al. The COSMIC cancer gene census: describing genetic dysfunction across all human cancers. *Nat. Rev. Cancer* **18**, 696–705 (2018).
- <sup>8</sup> Landrum, M. J. & Kattman, B. L. ClinVar at five years: Delivering on the promise. *Hum. Mutat.* **39**, 1623–1630 (2018).
- <sup>9</sup> Wu, P. et al. Integration and analysis of CPTAC proteomics data in the context of cancer genomics in the cBioPortal. *Mol Cell Proteomics* **18**, 1893 (2019).
- <sup>10</sup> Hung, J.-H. & Weng, Z. Sequence alignment and homology search with BLAST and ClustalW. *Cold Spring Harb Protoc* **2016**, pdb.prot093088 (2016).
- <sup>11</sup> Drozdetskiy, A., Cole, C., Procter, J. & Barton, G. J. JPred4: a protein secondary structure prediction server. *Nucleic Acids Res.* **43**, W389–W394 (2015).

## Supplementary Note 1

### Plasmids used

#### Human Sonic Hedgehog and EGFP plasmids

| Name          | Source                                  |
|---------------|-----------------------------------------|
| hSHH          | Origene RC222175                        |
| hSHH untagged | Origene RC222175, stop after hSHH(S462) |
| pEGFP-c1      | Addgene vdb2487                         |

### Organelle marker protein plasmids

| Addgene # | Plasmid              | Origin of localization sequence | Organelle |
|-----------|----------------------|---------------------------------|-----------|
| 55073     | mCherry-Lysosomes-20 | LAMP1                           | lysosomes |
| 55052     | mCherry-Golgi-7      | $\beta$ -galactosyltransferase  | Golgi     |
| 85048     | pmScarlet-Giantin-C1 | Giantin                         | Golgi     |

## Primers used

### Deletions and truncations

Cloning method: Inverse PCR

| Construct                                     | Forward Primer                                    | Reverse primer                                |
|-----------------------------------------------|---------------------------------------------------|-----------------------------------------------|
| hSHH( $\Delta$ 369-391) ( $\Delta$ 1st helix) | GCTACGCGGTTCATCCCGCGGCACGGA                       | GCGCGGGGATGACCCGAGAACCC                       |
| hSHH( $\Delta$ 431-447) ( $\Delta$ 2nd helix) | TGCGGGGCCACCGCGGACAGCGAGGC<br>CCTGC               | GCCTCGCTGTCCGCGGTGCCCCCGCACCCCG<br>GA         |
| hSHH( $\Delta$ 393-424) ( $\Delta$ loop)      | GCTGCACTGGCGCCCGGTGCGGGG                          | GGTGGCCCCGACCCGGCGCCAGT                       |
| hSHH(E368*) ( $\Delta$ SRR-Myc-DDK)           | TCGTGCTACGCGGTTCATCACGCGTACGC<br>GGCCGCTCGAGCAGAA | CGAGCGCGCGGTACGCGTGATGACCCGGTA<br>GCACGAGGCCA |

### Single amino acid mutations

Cloning method: Site directed mutagenesis

### Hint domain mutants

| Construct   | Forward Primer                   | Reverse primer                     |
|-------------|----------------------------------|------------------------------------|
| hSHH(C198A) | CAAATCGGAGGGCCCTTCCCGGCTCGG      | CCGAGCCCCGGAAGGCGCCTCCCGATTG       |
| hSHH(D243A) | TTCCTCACTTTCCTGGCCCCGACGACGGCGCC | GCGCCCCGTCGTCGCGGGCCAGGAAAGTGAGGAA |
| hSHH(T267A) | CGCCTGCTGCTCGCCCCCGCACCTG        | CAGGTGCGCGCGCGGAGCAGCAGGGCG        |
| hSHH(H270A) | GCTCACCGCCGGCCCTGCTCTTTGTGG      | CCACAAAGACAGGCGCCGCGCGGTGAGC       |
| hSHH(C363A) | GGTGCTGGCCTCGGCC TACGCGGTCAATG   | CGATGACCGCGTAGGCCGAGGCCAGCACCC     |
| hSHH(E368A) | GCGGTATCGCGGAGCACAGCTGGCGCACCCGG | GCTGTCTCCGCGATGACCCGCGTAGCACGAGGC  |
| hSHH(E368*) | GCTACGCGGTTCATCTGAGAGCACAGCTGGG  | CCCAGCTGTCTCAGATGACCCGCGTAGC       |

### 1<sup>st</sup> helix mutants

| Construct                                                     | Forward Primer                         | Reverse primer                              |
|---------------------------------------------------------------|----------------------------------------|---------------------------------------------|
| hSHH(W372A)                                                   | GAGGAGCACAGCGCGGCGCACCGGGC             | GCCCGGTGCGCCGGCTGTGCTCCTC                   |
| hSHH(H374A)                                                   | GTCATCGAGGAGCACAGCTGGCGGCCCGGGCC<br>TT | GCTGTGCTCCTCGATGACCCGCGTAGCACGAGGC<br>CAGCA |
| hSHH(R375A)                                                   | TGGGCGCACGGCCCTTCGGGCCCTTCGGCCTG       | CGCGAAGCCCGCGTGCGCCCAGCTGTGCTCCCTC          |
| hSHH(F377A)                                                   | CACCGGGCCCGCGGCCCTTCGGCCTGGCGCAC       | GAAGGCGCGCGGCCCGGTGCGCCCCAGCTGT<br>G        |
| hSHH(P379A)                                                   | GCCTTCGGGGCCTTCGGCCTGGCGCACGCGCTC      | CAGGCGGAAGCCCGCAAGGCCCGGTGCGGCC<br>A        |
| hSHH(F380A)                                                   | GCCTTCGGGCCCGGCCCTGGCGCA               | TGCGCCAGGCGGGCGGGCGGAAGGC                   |
| hSHH(R381A)                                                   | TTCGGCCCTTCGCCCTGGCGCACGCG             | CGCGTGCGCCAAGGGCAAGGGCGCGAA                 |
| hSHH(L382A)                                                   | CCCTTCGGCGCGCGCACGCGCTCCTGGCTGCA       | CGCGTGCGCCCGCGGAAAGGGCGGAAGGCC<br>G         |
| hSHH(L382E)                                                   | TTCCGGGAAGCGCACGCGCTCCTGGCTGCACT       | TGCGCTTCGGGAAGGGCGCGAAGGCCCGGT              |
| hSHH(H384A)                                                   | TTCCGGCTGGCGCGCGCTCCTGGC               | GCCAGGAGCGCGGCCCGCCAGGCGGAA                 |
| hSHH(L386A)                                                   | GCCTGGCGCACGCGGCCCTGGCTGCACTGGC        | GCCAGTGCAGCCAGGGCCCGCTGCGCCAGGC             |
| hSHH(L386E)                                                   | TTCCGGCTGGCGCACGCGGAACTGGCTGCACT       | TGCGCCAGGCGGAAAGGGCGCGAAGGCCCGGT            |
| hSHH(L387A)                                                   | GCGCACGCGCTCGCGGCTGCACTGGC             | GCCAGTGCAGCCCGAGCGCGTGCGC                   |
| hSHH(L387E)                                                   | GCGCACGCGCTCGAGGCTGCACTGGC             | GAGCGCCCGCTACGCGTGTGACTTGACCCG              |
| hSHH(L390A)                                                   | CGCTCCTGGCTGCAGCGCGCCCGCGCGCAC         | GTGCGCGGGCGGCCCGCTGCAGCCAGGAGCG             |
| hSHH(L390E)                                                   | CACGGCTCCTGGCTGCAGAAAGCCCGCGCGC<br>A   | AGCCAGGAGCGCGTGCGCCAGGCGGAAGGGCG<br>CGA     |
| hSHH(L382A/L386<br>Sequential mutagenesis; L382A-L386A-L390A) |                                        |                                             |



A/L390A)

## 2<sup>nd</sup> helix mutants

| <b>Construct</b> | <b>Forward Primer</b>                    | <b>Reverse primer</b>                   |
|------------------|------------------------------------------|-----------------------------------------|
| hSHH(I432A)      | GCCACCGGGGGCCACTGGTACTCGCA               | TGCGAGTACCAGTGGGGCCCGGGTGGCC            |
| hSHH(H433A)      | CACCGCGGCATCGCCTGGTACTCGCAGC             | GCTGCGAGTACCAGGCGGATGCCCCGCGGTG         |
| hSHH(W434A)      | CGCGGCATCCACGCGTACTCGCAGCTGC             | GCAGCTGCGAGTACGCGTGGATGCCCCGCG          |
| hSHH(Y435A)      | GGGCATCCACTGGGCCTCGCAGCTGCTCT            | AGAGCAGCTGCGAGGCCCCAGTGGATGCC           |
| hSHH-Y435D       | GCGGGCATCCACTGGGACTCGCAGCTGCTCTA<br>C    | GTAGAGCAGCTGCGAGTCCCAGTGGATGCCCCGC      |
| hSHH-Y435F       | GCGGGCATCCACTGGTTCTCGCAGCTGCTCTAC        | GTAGAGCAGCTGCGAGAACCCAGTGGATGCCCCGC     |
| hSHH-Q437A       | CATCCACTGGTACTCGGGCGCTGCTCTACCAAAT<br>AG | CTATTTGGTAGAGCAGCGCCGAGTACCAGTGGAT<br>G |
| hSHH-L438A       | CACTGGTACTCGCAGGCCCTCTACCAAATAGGC        | GCCTATTTGGTAGAGGGCCCTGCCAGTACCAGTG      |
| hSHH-L439A       | GTA CTGCGCAGCTGGCCTACCAAATAGGCACC        | GGTGCCTATTTGGTAGGCCCAGCTGCCAGGTAC       |
| hSHH-Y440A       | CTCGCAGCTGCTCGCCCCAAATAGGCACCT           | AGGTGCCTATTTGGGGCAGCAGCTGCCGAG          |
| hSHH-Q441A       | CCACTGGTACTCGCAGCTGCTCTACGCAATAGG<br>C   | CGCTGTCCAGGAGCCAGGTGCCTATTGCCGTAGAG     |
| hSHH-I442A       | CTGGTACTCGCAGCTGCTCTACCAAAGCAGGCAC<br>C  | CCTCGCTGTCCAGGAGCCAGGTGCCTGCTTGGTA      |
| hSHH(G443A)      | CAAATAGCCACCTGGCTCCTGGACAGCGAGGC<br>CC   | CCAGGTGGCTATTTGGTAGAGCAGCTGCCGAGTAC     |
| hSHH-T444A       | CTCTACCAAATAGGCGCCTGGCTCCTGGACAGC        | GCTGTCCAGGAGCCAGGCCCTATTTGGTAGAG        |
| hSHH-W445A       | TACCAAATAGGCACCGCCCTCCTGGACAGCGGAG       | CTCGCTGTCCAGGAGGGCGGCTATTTGGTA          |

|             |                                  |                                    |
|-------------|----------------------------------|------------------------------------|
| hSHH-L446A  | CAAATAGGCACCTGGGCCCTGGACAGCGAGGC | GGCCTCGCTGTCCAGGGCCCCAGGTGCCTATTTG |
|             | C                                |                                    |
| hSHH-L447A  | ATAGGCACCTGGCTCGCGACAGCGAGGCCCT  | CAGGGCCTCGCTGTCCGGAGCCAGGTGCCTAT   |
|             | G                                |                                    |
| hSHH(D448A) | CACCTGGCTCCTGGCCAGCGAGGCCCTGCA   | TGCAGGGCCTCGCTGGCCAGGAGCCAGGTG     |

### Primers to remove stop codons

|               |                                 |                                   |
|---------------|---------------------------------|-----------------------------------|
| hSHH-Unstop-1 | TCCAGCACGCGTACGGCCGCTCGAGCAGAAA | CGTACGCGTGTGGACTTGACCGCCATGCCCCAG |
|               | C                               |                                   |
| hSHH-Unstop-2 | CGGTCAAAGTCCAGCACGCGTACGGCCGCT  | AGCGGCCCGGTACGCGTGTGGACTTGACCCG   |

### EGFP fusion proteins

Cloning method: Gibson Assembly

|                         | Template               | Forward primer                                 | Reverse primer                                                                   |
|-------------------------|------------------------|------------------------------------------------|----------------------------------------------------------------------------------|
| <b>EGFP-SRR</b>         |                        |                                                |                                                                                  |
| Insert                  | pEGFP-c1               | GATCTGCCGCCGGATGCCCATGGT<br>GAGCAAGGGCGAG      | CTGTGCTCCTCGATGACCCGAGAACC<br>CCCACCACCGCTGCCACCACCCGCCCC<br>TTGTACAGCTCGTCCATGC |
| Backbone                | pCMV6-hSHH<br>untagged | GCGGTTCATCGAGGAGCACAGCTGGG<br>CGCAC            | GGCGATCGCGGGCGGAGATCTCCTC<br>GGTAC                                               |
| <b>EGFP-Hint(C198A)</b> |                        |                                                |                                                                                  |
| Insert                  | pCMV6-<br>hSHH(C198A)  | GCAGCGGTGTGGGGTTCTTCGGT<br>GAAAGCAGAGAACTCGGTG | GCCTCGTGTACGGGGTTCATCTGAC<br>GTACGGGGCCGCTC                                      |

|                          |             |                           |                            |
|--------------------------|-------------|---------------------------|----------------------------|
| Backbone                 | untagged    | TGACGTACGGCGCGCTCGAGCAGA  | AGAACCCCCACCCACCGCTGCCACCA |
|                          | EGFP-SRR    | AACTCAT                   | CC                         |
| <b>EGFP-Hint(C198A)-</b> |             |                           |                            |
| <b>SRR</b>               |             |                           |                            |
| Insert                   | pCMV6-      | GCAGCGGTGGTGGGGTTCCTTCGGT | GAGCGGCCGCGTACGTCAGCTGGAC  |
|                          | hSHH(C198A) | GAAAGCAGAGAACTCGGTG       | TTGACCCGCCCATGCC           |
|                          | untagged    |                           |                            |
| Backbone                 | EGFP-SRR    | TGACGTACGGCGCGCTCGAGCAGA  | AGAACCCCCACCCACCGCTGCCACCA |
|                          |             | AACTCAT                   | CC                         |
