# Supplementary material for: Dual roles of the sterol recognition region in Hedgehog protein modification
Source: PubMed Central journal article supplement (PMC7242414; doi:10.1038/s42003-020-0977-2), 2020-05-21
Supplement: 42003_2020_977_MOESM2_ESM.pdf [file 42003_2020_977_MOESM2_ESM.pdf]

## **Description of Additional Supplementary Files**

**File Name:** Supplementary Data 1

**Description:** Model of the human Sonic Hedgehog sequence (NP\_000184.1, residues 363-462) generated using the Ab Initio Rosetta fragment assembly method on the online Robetta server (<http://robetta.bakerlab.org/>).
